# Supplementary material for: DBC1/CCAR2 and CCAR1 Are Largely Disordered Proteins that Have Evolved from One Common Ancestor
Source: Hindawi journal article supplement (doi:10.1155/2014/418458), 2014-01-01
Supplement: f1 [file 418458.f1.pdf]

**S1-Like**

*Homo sapiens* ORVFTGIVTSLHDYFGVVDDEVFFOLS~~SVVKGR~~LPOLGKVLVKAAYNPGOAVPWN~~AVK~~  
*Pan troglodytes* ORVFTGIVTSLHDYFGVVDDEVFFOLS~~SVVKGR~~LPOLGKVLVKAAYNPGOAVPWN~~AVK~~  
*Equus caballus* ORVFTGIVTSLHDYFGVVDDEVFFOLS~~SVVKGR~~LPOLGKVLVKAAYNPGOAVPWN~~AVK~~  
*Mus musculus* ORVFTGIVTSLHDYFGVVDDEVFFOLS~~SVVKGR~~LPOLGKVLVKAAYNPGOAVPWN~~AVK~~  
*Anolis carolinensis* ORVFTGIVTSLHDYFGVVDDEVFFOLS~~SVVKGR~~LPOLGKVLVKAAYNPGOAVPWN~~AVK~~  
*Danio rerio* ORVFTGIVTSLHDYFGVVDDEVFFOLS~~SVVKGR~~IPOLIGKVLVKAAYNPSOSV~~PWNALK~~  
*Caenorhabditis elegans* ORVFTGVV~~TQMOEH~~HGIVDQDVH~~FPM~~SVV~~VGRMP~~VVGEKVLVKA~~IQDSQKPTLSWTAQK~~

**NLS**

*Homo sapiens* KRKORAGGE~~PWGAKK~~PRH  
*Pan troglodytes* KRKORAGGE~~PWGAKK~~PRH  
*Equus caballus* KRKORAGGE~~PWGAKK~~PRH  
*Mus musculus* KRKORAGGE~~PWGAKK~~PRH  
*Anolis carolinensis* KRKORAGGE~~PWGAKK~~PRH  
*Danio rerio* KRKOK-GNE~~PWGV~~KRPRH  
*Caenorhabditis elegans* RKRWRATS~~E~~EEA~~P~~KK~~T~~SS

**LZ**

*Homo sapiens* LORRYRSL~~LVPSDF~~LSVHLSW~~L~~  
*Pan troglodytes* LORRYRSL~~LVPSDF~~LSVHLSW~~L~~  
*Equus caballus* LORRYRSL~~LVPSDF~~LVHLSW~~L~~  
*Mus musculus* LORRYRSL~~LVPSDF~~LSVHLSW~~L~~  
*Anolis carolinensis* LORRYRSL~~LVPSDF~~LSVHLSW~~L~~  
*Danio rerio* IIRRYSSI~~Q~~LPKEFYDV~~R~~LSW~~L~~  
*Caenorhabditis elegans* LORRYPHL~~H~~IPSS~~L~~FHL~~O~~LSW~~T~~

**Nudix**

*Homo sapiens* EHPLKQIK~~FF~~ILGRKEE~~EA~~VLGG~~EWSP~~SIDGID~~P~~QAD~~P~~QV~~LV~~RTA~~RCAQA~~Q~~AT~~CI~~D~~LSG~~CT~~W~~WR~~A~~EF~~QY~~I~~Q~~G~~PPRR~~LOT~~V~~VV~~LPD~~V~~WTIMPT~~EE~~WE~~A~~TC~~OOK~~AAE--~~A~~APPT~~Q~~EAQ~~GET~~  
*Pan troglodytes* EHPLKQIK~~FF~~ILGRKEE~~EA~~VLGG~~EWSP~~SIDGID~~P~~QAD~~P~~QV~~LV~~RTA~~RCAQA~~Q~~AT~~CI~~D~~LSG~~CT~~W~~WR~~A~~EF~~QY~~I~~Q~~G~~PPRR~~LOT~~V~~VV~~LPD~~V~~WTIMPT~~EE~~WE~~A~~TC~~OOK~~AAE--~~A~~APPT~~Q~~EAQ~~GET~~  
*Equus caballus* EHPLKQIK~~FF~~ILGRKEE~~EA~~VLGG~~EWSP~~SIDGID~~P~~QAD~~P~~QV~~LV~~RTA~~RCAQA~~Q~~AT~~CI~~D~~LSA~~CT~~W~~WR~~A~~EF~~QY~~I~~Q~~G~~PPRR~~LOT~~V~~VV~~LPD~~V~~GTIMPT~~EE~~WE~~A~~V~~COOK~~AAE--~~A~~APPP~~Q~~EV~~PV~~ET  
*Mus musculus* EHPLKQIK~~FF~~ILGRKEE~~EA~~VLGG~~EWSP~~SIDGID~~P~~QAD~~P~~QV~~LV~~RTA~~RCAQA~~Q~~AT~~CI~~D~~LSA~~CT~~W~~WR~~A~~EF~~QY~~I~~Q~~G~~PPRR~~LOT~~V~~VV~~LPD~~V~~WTIMPT~~EE~~WE~~A~~TC~~OOK~~AAE--~~A~~APPP~~Q~~EV~~PV~~ET  
*Anolis carolinensis* EHPLKQIK~~FF~~ILGRKEE~~EA~~VLGG~~EWSP~~SIDGID~~P~~QAD~~P~~QV~~LV~~RTA~~RCAQA~~Q~~AT~~CI~~D~~LSG~~CT~~W~~WR~~A~~EF~~QY~~I~~Q~~G~~PPRR~~LOT~~V~~VV~~LPD~~V~~WTIMPT~~EE~~WE~~A~~TC~~OOK~~AAE--~~A~~APPP~~Q~~EV~~PV~~ET  
*Danio rerio* EHPAKQIK~~FF~~ILGKKA~~DE~~TV~~L~~GG~~EWSP~~SIDGID~~P~~QAN~~PM~~V~~L~~RTA~~RCTK~~V~~Q~~IGI~~D~~LTG~~CT~~W~~WR~~A~~EF~~RY~~TR~~EN~~PS~~HQ~~EQ~~T~~V~~ELPD~~V~~NS~~CM~~PS~~EE~~WE~~A~~TC~~OK~~AAE~~KN~~PS~~AP~~Q~~EE~~TAVME  
*Caenorhabditis elegans* HPSTL~~I~~K~~FF~~I~~V~~DSG~~CE~~Q~~R~~L~~F~~GG~~HW~~SP~~E~~AD~~G~~AN~~P~~AK~~D~~SL~~T~~LVN~~T~~AV~~R~~CL~~K~~E~~Q~~AG~~I~~LSA~~CT~~W~~Y~~K~~MA~~EL~~R~~Y~~L~~SGD---KVET~~V~~V~~I~~MPD~~V~~N~~L~~V~~PS~~EE~~W~~AS~~I~~

**EF-Hand**

*Homo sapiens* DC~~LL~~A~~F~~V~~F~~FDANW~~CGY~~L~~H~~R~~R~~D~~L~~E~~R~~I~~L~~L~~T~~L~~G~~I~~R~~L~~S~~A~~E~~O~~A~~K~~O~~L~~V~~S~~R~~V  
*Pan troglodytes* DC~~LL~~A~~F~~V~~F~~FDANW~~CGY~~L~~H~~R~~R~~D~~L~~E~~R~~I~~L~~L~~T~~L~~G~~I~~R~~L~~S~~A~~E~~O~~A~~K~~O~~L~~V~~S~~R~~V  
*Equus caballus* DC~~LL~~A~~F~~V~~F~~FDANW~~CGY~~L~~H~~R~~R~~D~~L~~E~~R~~I~~L~~L~~T~~L~~G~~L~~R~~L~~S~~A~~E~~O~~A~~K~~O~~L~~V~~S~~R~~V  
*Mus musculus* DC~~LL~~A~~F~~V~~F~~FDANW~~CGY~~L~~H~~R~~R~~D~~L~~E~~R~~V~~L~~L~~T~~L~~G~~I~~R~~L~~S~~A~~E~~O~~A~~K~~O~~L~~V~~S~~R~~V  
*Anolis carolinensis* DA~~LL~~A~~F~~V~~Y~~FDL~~NG~~C~~G~~Y~~L~~H~~R~~K~~D~~I~~E~~K~~I~~L~~L~~L~~T~~L~~G~~L~~H~~L~~C~~K~~E~~O~~V~~K~~H~~L~~V~~N~~R~~V  
*Danio rerio* KV~~LL~~S~~C~~V~~F~~ED~~R~~Q~~L~~T~~G~~S~~L~~R~~E~~A~~D~~L~~V~~N~~L~~L~~S~~L~~G~~L~~F~~L~~S~~P~~A~~O~~A~~Q~~D~~L~~V~~K~~R~~A

**CC2**

*Homo sapiens* A-APTE~~H~~KA-~~I~~V~~S~~H~~N~~G~~S~~L~~I~~N~~V~~G~~S~~L~~L~~O~~R~~A~~E~~O~~Q~~D~~S~~G~~R~~L~~Y~~EN~~K~~I~~H~~T~~L~~E~~K~~EE~~S~~H~~N~~R~~F~~S~~A~~E~~V~~T~~N~~K~~T~~I~~A~~E~~M~~O~~E~~I~~R~~V~~R~~I~~A~~E~~A~~E~~T~~A~~R~~I~~A~~E~~R~~O~~K~~S~~Q~~L~~O~~R~~I~~L~~O~~E~~I~~RR~~R~~I~~T~~P~~L~~O~~L~~E~~T~~OR~~V~~E~~K~~A~~D~~S~~W~~E~~K~~E~~E~~  
*Pan troglodytes* A-APTE~~H~~KA-~~I~~V~~S~~H~~N~~G~~S~~L~~I~~N~~V~~G~~S~~L~~L~~O~~R~~A~~E~~O~~Q~~D~~S~~G~~R~~L~~Y~~EN~~K~~I~~H~~T~~L~~E~~K~~EE~~S~~H~~N~~R~~F~~S~~A~~E~~V~~T~~N~~K~~T~~I~~A~~E~~M~~O~~E~~I~~R~~V~~R~~I~~A~~E~~A~~E~~T~~A~~R~~I~~A~~E~~R~~O~~K~~S~~Q~~L~~O~~R~~I~~L~~O~~E~~I~~RR~~R~~I~~T~~P~~L~~O~~L~~E~~T~~OR~~V~~E~~K~~A~~D~~S~~W~~E~~K~~E~~E~~  
*Equus caballus* V-APME~~H~~KG-~~I~~V~~A~~H~~N~~G~~S~~L~~I~~N~~V~~G~~S~~L~~L~~O~~R~~A~~E~~O~~Q~~D~~S~~G~~R~~L~~Y~~EN~~K~~I~~H~~T~~L~~E~~K~~EE~~S~~H~~N~~R~~F~~S~~A~~E~~V~~T~~N~~K~~T~~I~~A~~E~~M~~O~~E~~I~~R~~V~~R~~I~~A~~E~~A~~E~~T~~A~~R~~I~~A~~E~~R~~O~~K~~N~~Q~~L~~O~~R~~I~~L~~O~~D~~F~~RR~~R~~I~~T~~P~~L~~O~~L~~E~~M~~O~~R~~I~~V~~E~~K~~A~~D~~S~~W~~E~~K~~E~~E~~  
*Mus musculus* A-APTE~~H~~KG-~~I~~V~~P~~H~~N~~G~~S~~L~~I~~N~~V~~G~~S~~L~~L~~O~~R~~A~~E~~O~~Q~~D~~S~~G~~R~~L~~Y~~EN~~K~~I~~H~~T~~L~~E~~K~~EE~~S~~H~~N~~R~~F~~S~~A~~E~~V~~T~~N~~K~~T~~I~~A~~E~~M~~O~~E~~I~~R~~V~~R~~I~~A~~E~~A~~E~~T~~A~~R~~I~~A~~E~~R~~O~~K~~N~~Q~~L~~O~~R~~I~~L~~O~~D~~F~~RR~~R~~I~~T~~P~~L~~H~~I~~E~~M~~O~~R~~I~~V~~E~~K~~A~~D~~S~~W~~E~~K~~E~~E~~  
*Anolis carolinensis* KSV~~P~~AS~~Q~~SG~~N~~V~~V~~H~~N~~G~~A~~V~~I~~N~~V~~D~~K~~L~~L~~E~~K~~A~~E~~O~~T~~E~~S~~S~~R~~L~~Y~~L~~E~~T~~K~~I~~H~~T~~L~~E~~K~~EE~~T~~O~~L~~R~~F~~S~~A~~E~~S~~N~~K~~S~~T~~I~~E~~V~~O~~E~~I~~O~~K~~R~~I~~T~~E~~M~~E~~H~~Q~~S~~K~~V~~T~~E~~K~~O~~T~~N~~F~~O~~R~~I~~L~~O~~E~~N~~K~~R~~I~~A~~P~~L~~O~~L~~E~~T~~O~~K~~I~~L~~E~~K~~T~~N~~N~~C~~L~~E~~K~~E~~E~~  
*Danio rerio* SV~~R~~R~~T~~S~~V~~T~~D~~-~~V~~N~~Y~~K~~C~~K~~V~~N~~L~~P~~N~~L~~L~~O~~C~~L~~E~~S~~K~~V~~A~~Q~~R~~D~~L~~E~~K~~S~~V~~A~~A~~L~~O~~S~~R~~L~~D~~A~~E~~---~~A~~L~~O~~A~~S~~E~~Q~~E~~L~~A~~O~~Q~~E~~L~~K~~R~~K~~L~~E~~K~~A~~E~~M~~I~~N~~K~~I~~Y~~E~~K~~S~~-----~~L~~K~~E~~N~~A~~G~~O~~M~~A~~V~~I~~E~~K~~M~~O~~R~~M~~V~~E~~O~~T~~T~~I~~T~~N~~A~~N~~A
