# Supplementary material for: DBC1/CCAR2 and CCAR1 Are Largely Disordered Proteins that Have Evolved from One Common Ancestor
Source: Hindawi journal article supplement (doi:10.1155/2014/418458), 2014-01-01
Supplement: f2 [file 418458.f2.pdf]

**S1-Like**

*Homo sapiens* ORVFTGVVTKLHDTFGFVDEDDVFFOLSAVKGKTPQVGDRLVVEATYNNPMPFKWNAOR  
*Pan troglodytes* ORVFTGVVTKLHDTFGFVDEDDVFFOLSAVKGKTPQVGDRLVVEATYNNPMPFKWNAOR  
*Equus caballus* ORVFTGVVTKLHDTFGFVDEDDVFFOLSAVKGKTPQVGDRLVVEATYNNPMPFKWNAOR  
*Mus musculus* ORVFTGVVTKLHDTFGFVDEDDVFFOLSAVKGKTPQVGDRLVVEATYNNPMPFKWNAOR  
*Anolis carolinensis* ORVFTGVVTKLHDTFGFVDEDDVFFOLSAVKGKTPQVGDRLVVEATYNNPMPFKWNAOR  
*Danio rerio* ORVFTGVVSKLHDTFGFVDEDDVFFOLSAVKGKTPQVGDRLVVEATYNNPMPFKWNAOR  
*Caenorhabditis elegans* ORVFTGVVTKMLDITYGFVDDDDVFFOHSVIRGSHPRVGDKVMVEANYNPNSMPFKWNAV

**NLS**

*Homo sapiens* RERERRRRSRERSPOQRKRSRERSPRRERERSPPRRVRR  
*Pan troglodytes* RERERRRRSRERSPOQRKRSRERSPRRERERSPPRRVRR  
*Equus caballus* RERERRRRSRERSPOQRKRSRERSPRRERERSPPRRVRR  
*Mus musculus* RDRERRRRSRERSPOQRKRSRERSPRRERERSPPRRVRR  
*Anolis carolinensis* RERERRRRSRERSPOQRKRSRERSPRRERERSPPRRVRR  
*Danio rerio* RERERRRRSRERSPMRKRSDRSPPREER--SPRRVRR  
*Caenorhabditis elegans* APAKNDRK RERESP--SGSIVAPISVRRRESASP RRARR

**LZ**

*Homo sapiens* LRRRYONLYIPSDFFDAOETWVDAEPL  
*Pan troglodytes* LRRRYONLYIPSDFFDAOETWVDAEPL  
*Equus caballus* LRRRYONLYIPSDFFDAOETWVDAEPL  
*Mus musculus* LRRRYONLYIPSDFFDAOETWVDAEPL  
*Anolis carolinensis* LRRRYONLYIPSDFFDAOETWVDAEPM  
*Danio rerio* LRRRYOSLYIPSDFFNAVETWVDAEPL  
*Caenorhabditis elegans* LRHRYSKLYLPSDYVDLSFDWVRSRQIL

**Nudix**

*Homo sapiens* HOHPARLVK---EAVGMKGGDEAMAIGGWSPSLDGPDPEKDPVVIKLAIRCCAKATGIDLSVCHTOWYRFAETIRYRPEETHKGRIVPAHVETVLEHFPDVF-WHCLEPTR-SEN  
*Pan troglodytes* HOHPARLVK---EAVGMKGGDEAMAIGGWSPSLDGPDPEKDPVVIKLAIRCCAKATGIDLSVCHTOWYRFAETIRYRPEETHKGRIVPAHVETVLEHFPDVF-WHCLEPTR-SEN  
*Equus caballus* HOHPARLVK---EAVGMKGGDEAMAIGGWSPSLDGPDPEKDPVVIKLAIRCCAKATGIDLSVCHTOWYRFAETIRYRPEETHKGRIVPAHVETVLEHFPDVF-WHCLEPTR-SEN  
*Mus musculus* HOHPARLVK---EAVGMKGGDEAMAIGGWSPSLDGPDPEKDPVVIKLAIRCCAKATGIDLSVCHTOWYRFAETIRYRPEETHKGRIVPAHVETVLEHFPDVF-WHCLEPTR-SEN  
*Anolis carolinensis* HOHPARLVK---EAVGMKGGDEAMAIGGWSPSLDGPDPEKDPVVIKLAIRCCAKATGIDLSVCHTOWYRFAETIRYRPEETHKGRIVPAHVETVLEHFPDVF-WHCLEPTR-SEN  
*Danio rerio* HOHPARLVK---EAVGMKGGDEAMAIGGWSPSLDGPDPEKDPVVIKLAIRCCAKATGIDLSVCHTOWYRFAETIRYRPEETHKGRIVPAHVETVLEHFPDVF-WHCLEPTR-SEN  
*Caenorhabditis elegans* HOEPQSLIKNLHEAVGARGKHEIMGIGGSWSPSLDGADPEHDAVVIKLAIRCCAKATGIDLSVCHTOWYRFAETIRYRPEETHKGRIVPAHVETVLEHFPDVF-WHCLEPTR-SEN

**SAP**

*Homo sapiens* KTMKVNDLRKELESRALSSKGLKSOLIARLTKO  
*Pan troglodytes* KTMKVNDLRKELESRALSSKGLKSOLIARLTKO  
*Equus caballus* KTMKVNDLRKELESRALSSKGLKSOLIARLTKO  
*Mus musculus* KAMKVNDLRKELESRALSSKGLKSOLIARLTKO  
*Anolis carolinensis* KAMKVNDLRKELESRALSSKGLKSOLIARLTKO  
*Danio rerio* KSMKVS DLRKELESRALSSKGLKSOLIARLTKO  
*Caenorhabditis elegans* KSMKVAELRVELELRGLLETGKTKKLLVQRIQT

**CC1**

*Homo sapiens* EAEAEAD-EEDDRDEEEMTK---RDDKRDINRY  
*Pan troglodytes* EAEAEAD-EEDDRDEEEMTK---RDDKRDINRY  
*Equus caballus* EAEAEAD-EEDDRDEEEMTK---RDDKRDVINKY  
*Mus musculus* EAEAEAD-EEDDRDEEEMTK---RDDKRDVINKY  
*Anolis carolinensis* EAEAEAD-EEDDRDEEEMTK---RDDKRDVINKY  
*Danio rerio* EAEDADDYDDDDKDEEDISNGRDRRDDRD-DRK  
*Caenorhabditis elegans* FDSNLCGYLTKDKDIEEILYNGEFGISRQIQIKL

**EF-Hand**

*Homo sapiens* DVGSLLQKLEKSEKVRAEVEOKIQLLEEKTDDEDEKTLNLENENSKSLSGELREVKKDLSOLOENLKISEN MNLQFENOMNKTIRNLISF  
*Pan troglodytes* DVGSLLQKLEKSEKVRAEVEOKIQLLEEKTDDEDEKTLNLENENSKSLSGELREVKKDLSOLOENLKISEN MNLQFENOMNKTIRNLISF  
*Equus caballus* DVGSLLQKLEKSEKVRAEVEOKIQLLEEKTDDEDEKTLNLENENSKSLSGELREVKKDLSOLOENLKISEN MNLQFENOMNKTIRNLISF  
*Mus musculus* DVGSLLQKLEKSEKVRAEVEOKIQLLEEKTDDEDEKTLNLENENSKSLSGELREVKKDLSOLOENLKISEN MNLQFENOMNKTIRNLISF  
*Anolis carolinensis* DVGSLLQKLEKSEKVRAEVEOKIQLLEEKTDDEDEKTLNLENENSKSLSGELREVKKDLSOLOENLKISEN MNLQFENOMNKTIRNLISF  
*Danio rerio* DVGSMMOKLEKSEKTRIEDIEOKIMQODVKMPEEDSKHLSELEAANRSLOKELDDVKNTRRETESKLTASDQRKGRPEOQLHSIVSSLDI  
*Caenorhabditis elegans* KLNETSAGLTKSLODEN SALKOALLODCRHADRI FSVVEKVMPPPPKKEEKS KDKDEKTKDKKDD-KVSEKSAEKSTEFPSQEV PASAE

**CC2**

*Homo sapiens* DLLMA-----FVYFDO--SHCGYILEKDLFEELYTI GLHLSRAOVKKLINKV  
*Pan troglodytes* DLLMA-----FVYFDO--SHCGYILEKDLFEELYTI GLHLSRAOVKKLINKV  
*Equus caballus* DLLMA-----FVYFDO--SHCGYILEKDLFEELYTI GLHLSRAOVKKLINKV  
*Mus musculus* DLLMA-----FVYFDO--SHCGYILEKDLFEELYTI GLHLSRAOVKKLINKV  
*Anolis carolinensis* DLLMA-----FVYFDO--SHCGYILEKDLFEELYTI GLHLSRAOVKKLINKV  
*Danio rerio* DLLMA-----FVYFDO--SHCGYILEKDLFEELYTI GLHLSRAOVKKLINKV  
*Caenorhabditis elegans* NVRHTPGGADDV VETD DLRIGFCYNLAKSMEPA--DSGAAVKSSSEVSSASSDGV
