# Supplementary material for: DBC1/CCAR2 and CCAR1 Are Largely Disordered Proteins that Have Evolved from One Common Ancestor
Source: Hindawi journal article supplement (doi:10.1155/2014/418458), 2014-01-01
Supplement: f5 [file 418458.f5.pdf]

F1QV66 MAQFGGQKNPWAQAATAVVSQPGHTGQSLDLNLSLHSLGVQQSLLGASPMYTQQSALA 60  
E9QH28 -----

F1QV66 AASLNSQSAANYQLSQQTAALQQQAAAAAAAAALQQSQINSALQQYQQQQQQQQPPQAP 120  
E9QH28 -----

F1QV66 PPQPPQQTLYNVPHQLPQPQALLSQPPVALPTSLSLNSPQQTAAQITVSYPTPRSSHQQ 180  
E9QH28 -----

F1QV66 QTQPQKQRVFTGVVSKLHDTFGFVDEDFVFFQLSAVKGKTPQVGDRVLVEAVYNPNMPFKW 240  
E9QH28 METQMRQRVFTGVVTQMQEHHGIVDQDVHFPMSVVVGRMPVVGKVLVKAIQDSQKPI SW 60  
:\*\*\*\*\*::: :\*:\*\*\*:\*:\* :\*.\* \* : \* \*::\*\*\*\*\*: : : \*::\*

F1QV66 NAQRIQTLPLPQPNQTHQPPQPLPQVSPQLSSFYTDAGMQRYSDLHSAVDSRQNSQPQVFN 300  
E9QH28 TAQKVQTLNGQPFKSPPP-----LLPSMSS 85  
\*::\*\*\* \* : : \*

F1QV66 MMKPGPTMLQSLPPPTTFSVPAQGPPLSLQAQLSAAASLAPLLQNPQPPLLPQPPKDSV 360  
E9QH28 TLKPG-----ILGTPKPLLKSPKIPPLI 109  
:\*\*\* : \* . \*\*\*\*\* . \* :

F1QV66 FSGLLQFPVRMMPQPQQVRRVEPSRPFNRSRDRPELILRKDDRSRERERERRRERSR 420  
E9QH28 PSMQPNSSGMIQLSHHQMGWNGPFDWGGGRKRHSEGMGRRRAGRWEDGGGGLWGGDLM 169  
\* . : : : \* : \* . \* . : . \* . :

F1QV66 MRKRSRDRSPRRERSRPRRPRRVPRYTVQFSKFSLDGYNCDMMELRRRYQSLYIPSDFFN 480  
E9QH28 HQKRRWRATSEEEAPKKTSSAATHSVLFCFSRDTQACDYLELQRRYPHLHIPSLSFH 229  
:\*\*\* \* : . \* : \* : . . . : \* \* \* \* \* \* \* : \* : \* \* \* \* \* : \* : \* \* \* :

F1QV66 AVFTWVDAFPLSRPFTFGNYCNFHMHKEVDSLKNTAVLDPDANHTYSAKVMLLANPS 540  
E9QH28 LQLSWTESFPLDQPLPLRGPCLFHIGPNQPTEADVCESTD-----DAFAVRVLLFSMPC 284  
: \* : : \* \* \* : \* : : . \* \* \* \* \* : : : . . \* . : : : : \* : \* : \* :

F1QV66 LDELYHKSCALSEDPAELRDSFQHPARLIKFLVGMRGKDEAMAIGGHWSPLDGDADPEHD 600  
E9QH28 LEDVYSQCCNLSND-GQTQKEAVHPSTLLKFLIVDSG-GEQRLPGGHWSPEADGANPAKD 342  
\* : : \* : \* \* : \* : : . . \* : \* : \* : \* : \* \* \* \* \* \* \* \* \* \* \* : \* :

F1QV66 ASVLIKTAVRCKALTGIDLCTQWYRFAEIRYHRPEETHKGRTPPAHVETVVLFLPDV 660  
E9QH28 SLTLVNTAVRCLKEQAGLDLSACTQWYKMAELRYLSGD-----KVETVVVLMMPDV 392  
: . \* : \* \* \* \* \* \* \* : \* : \* \* \* \* \* \* : \* : \* \* \* : : \* : \* \* \* \* \* : \* \* \* :

F1QV66 WHCLPTRSEWEELSRGLKEQLAEKLLAERKEADGEQEEEDKDEDDSKVETTPTHWSKLP 720  
E9QH28 WNLVPSSEEWASLQ----- 406  
\* : : \* : \* \* \* . \* .

F1QV66 KSMKVSDLRKELESRSLSKGLKSQLIARLTKQLKVEEQVEESKEPEKPEPPSVEEDESC 780  
E9QH28 -----

F1QV66 RLEDDREEEERKRQEEQERQRERRRYVLPDEPTIVHFNWAAKNGKFDSCSIMSLSVLLDY 840  
E9QH28 -LEDDL-----LPESPVSVFHP-----SAGLNL SAVLSLSLLEP 440  
\*\*\*\* . \* : \* : \* : \* \* . . : : \* : \* \* \* \* :

F1QV66 RLEDNKEHSFEVSLFAELFNEMLQRDFGYRIYKALASLPTKDEKDKKERAKKEAERRDI 900  
E9QH28 QTLQTR-DSCEVSLIAEMFSEMLQRDFGLQLYRCLCSLPQNISDPQTEAKQDNNTAKEEE 499  
: : : . \* \* \* \* \* : \* : \* \* \* \* \* : \* : \* \* \* \* : . . : : : : : :

F1QV66 KKERDEDNGEPVAKRIREEDDKRDEKERGIKREESKDDDDNEDGSSNNNADEYDPLEA 960  
E9QH28 EEIK-----KSDKKTTKKDKSSDARKTVKEEKDAEDAMLTDETEAVGKQPS 545  
: : : \* : \* : \* \* : \* : \* \* \* \* \* . : : : : . :

F1QV66 EDADDYDDDDKDEDSNGRDRDRDRDRDRKSKDRSSKDKDEKKRQMVTFNKDLLMAFVYF 1020  
E9QH28 RDGKTVSAG-VEEQSSNAADN-----QTSKHCPGPWTDELPRKVLSCVFF 592  
. \* . . . : : \* \* . \* . : \* \* . : . : : \* : \* \* :

F1QV66 DQSHCGYLLEKDLEEIMYTLGLHLHLSRAQVKLLNKPLVKESCHYRKLTDPRKDEPCPALI 1080  
E9QH28 DRQLTGLSLREADLVNILLSLGLFLSPAQAQDLVKRAAVGGLCLYRNLCRWSDSAPSAS 652  
\* : . \* \* \* \* \* \* : \* : \* \* \* \* \* \* : \* : : . \* \* \* \* \* \* . \* . .

F1QV66 SEAHIDNLLGNQILLTSQKIKREPDESSESGLIVYKALVDVGSMMQKLEKSEKTFREDI 1140  
E9QH28 AIAEGN---KAMLPTQPCCKDRGVRRTSNTDVVNYKGVVNLPNLLQCLESKVAQRDL 708  
: \* : : : \* \* . \* . . . : \* \* \* \* \* : \* : \* \* \* \* \* : \* : \* \* :

F1QV66 EQKLMQDVKMEEDSKHLSELEAANRSLQKELDDVKNTLRETESKLTASDQRKGRFEQQL 1200  
E9QH28 EKSVAALQSRLD-----AAEALQASSEQELAQKELKRKLEKAEMINKTYEKSL 757  
\* : : : : : \* : \* \* \* \* : \* : \* \* \* \* : \* : \* \* \* \* : \* : \* \* :

F1QV66 HSTVSSLDTIKELQGVLANNDHSEADHKTQANGSDE 1238  
E9QH28 KENAGQMTAVIEKMRMVEQTTTITNANAGKEEKL--- 792  
: . . . . : : : \* : : : . \* : . : :
