# Supplementary material for: DBC1/CCAR2 and CCAR1 Are Largely Disordered Proteins that Have Evolved from One Common Ancestor
Source: Hindawi journal article supplement (doi:10.1155/2014/418458), 2014-01-01
Supplement: f6 [file 418458.f6.pdf]

| <b>Species</b>                                            | <b>DBC1</b> | <b>CCAR1</b> | <b>LST-3</b> |
|-----------------------------------------------------------|-------------|--------------|--------------|
| <i>Homo sapiens</i> (Human)                               | Q8N163      | Q8IX12       | —            |
| <i>Pongo abelii</i> (Orangutan)                           | Q5R8S0      | H2NAQ9       | —            |
| <i>Pan troglodytes</i> (Chimpanzee)                       | H2QVV3      | H2Q1Z8       | —            |
| <i>Macaca mulatta</i> (Rhesus Monkey)                     | F6RJW4      | F6TNW6       | —            |
| <i>Nomascus leucogenys</i> (Gibbon)                       | G1S0U2      | G1RM48       | —            |
| <i>Gorilla gorilla gorilla</i> (Lowland Gorilla)          | G3QJ10      | G3QJY0       | —            |
| <i>Rattus norvegicus</i> (Rat)                            | D3ZG47      | F1LM55       | —            |
| <i>Mus musculus</i> (Mouse)                               | Q8VDP4      | Q8CH18       | —            |
| <i>Pteropus alecto</i> (Black flying fox)                 | L5L6J0      | L5KGF7       | —            |
| <i>Spermophilus tridecemlineatus</i> (Ground squirrel)    | I3MHS6      | I3LYS6       | —            |
| <i>Mustela putorius furo</i> (European domestic ferret)   | M3XWK6      | M3XZT2       | —            |
| <i>Cavia porcellus</i> (Guinea pig)                       | H0VI64      | H0V2G0       | —            |
| <i>Otolemur garnettii</i> (Garnett's greater bushbaby)    | H0X308      | H0X8T3       | —            |
| <i>Sarcophilus harrisii</i> (Tasmanian devil)             | G3X2S1      | G3VZQ7       | —            |
| <i>Myotis lucifugus</i> (Little brown bat)                | G1P531      | G1NV87       | —            |
| <i>Felis catus</i> (Cat)                                  | M3W4H2      | M3WHD5       | —            |
| <i>Canis familiaris</i> (Dog)                             | E2RKJ1      | E2QS34       | —            |
| <i>Ailuropoda melanoleuca</i> (Giant panda)               | G1L8L0      | G1MI35       | —            |
| <i>Loxodonta africana</i> (African elephant)              | G3TKV2      | G3SXP2       | —            |
| <i>Bos taurus</i> (Bovine)                                | E1B9H3      | Q17R04       | —            |
| <i>Bos mutus</i> (Wild yak)                               | L8INM1      | L8HXX6       | —            |
| <i>Equus caballus</i> (Horse)                             | F6VJ81      | F6XN96       | —            |
| <i>Oryctolagus cuniculus</i> (Rabbit)                     | G1T501      | G1T536       | —            |
| <i>Anolis carolinensis</i> (Green anole)                  | H9GUP4      | H9GFZ8       | —            |
| <i>Pelodiscus sinensis</i> (Chinese softshell turtle)     | K7GJ39      | K7FC21       | —            |
| <i>Takifugu rubripes</i> (Japanese pufferfish)            | H2UA38      | H2UA36       | —            |
| <i>Latimeria chalumnae</i> (West Indian ocean coelacanth) | H3ATA1      | H3B750       | —            |
| <i>Danio rerio</i> (Zebrafish)                            | E7FGT1      | F1QV66       | —            |
| <i>Sus scrofa</i> (Pig)                                   | F1RMA3      | —            | —            |
| <i>Macaca fascicularis</i> (Crab-eating macaque)          | G7PCV6      | —            | —            |
| <i>Cricetulus griseus</i> (Chinese hamster)               | G3GUY5      | —            | —            |
| <i>Callithrix jacchus</i> (White-tufted-ear marmoset)     | —           | F7I8T1       | —            |
| <i>Tupaia chinensis</i> (Chinese tree shrew)              | —           | L9JR90       | —            |
| <i>Monodelphis domestica</i> (Gray short-tailed opossum)  | —           | F6VYZ1       | —            |
| <i>Myotis davidii</i> (David's myotis)                    | —           | L5M3R6       | —            |
| <i>Ornithorhynchus anatinus</i> (Duckbill platypus)       | —           | F6V6B0       | —            |
| <i>Columba livia</i> (Domestic pigeon)                    | —           | R7VNX9       | —            |
| <i>Gallus gallus</i> (Chicken)                            | —           | F1P4X5       | —            |
| <i>Taeniopygia guttata</i> (Zebra finch)                  | —           | H0Z024       | —            |
| <i>Meleagris gallopavo</i> (Common turkey)                | —           | G1MYH8       | —            |
| <i>Xenopus laevis</i> (African clawed frog)               | —           | Q641G3       | —            |
| <i>Xenopus tropicalis</i> (Western clawed frog)           | —           | F6RQZ6       | —            |
| <i>Gasterosteus aculeatus</i> (Three-spined stickleback)  | —           | G3NYR2       | —            |
| <i>Xiphophorus maculatus</i> (Southern platyfish)         | —           | M3ZKQ0       | —            |
| <i>Tetraodon nigroviridis</i> (Spotted green pufferfish)  | —           | H3CTD1       | —            |
| <i>Oreochromis niloticus</i> (Nile tilapia)               | —           | I3KPZ5       | —            |

|                                                          |   |        |        |
|----------------------------------------------------------|---|--------|--------|
| <i>Chelonia mydas</i> (Green sea-turtle)                 | — | M7CHZ7 | —      |
| <i>Apis mellifera</i> (Honeybee)                         | — | H9KE07 | —      |
| <i>Nasonia vitripennis</i> (Parasitic wasp)              | — | K7J0P2 | —      |
| <i>Culex quinquefasciatus</i> (Southern house mosquito)  | — | B0XGS6 | —      |
| <i>Bombyx mori</i> (Silk moth)                           | — | H9JSF9 | —      |
| <i>Pediculus humanus subsp. corporis</i> (Body louse)    | — | E0W1T1 | —      |
| <i>Camponotus floridanus</i> (Florida carpenter ant)     | — | E1ZZH2 | —      |
| <i>Harpegnathos saltator</i> (Jumping ant)               | — | E2BXL7 | —      |
| <i>Acromyrmex echinator</i> (Panamanian leafcutter ant)  | — | F4WLM0 | —      |
| <i>Crassostrea gigas</i> (Pacific oyster)                | — | K1QFN3 | —      |
| <i>Strongylocentrotus purpuratus</i> (Purple sea urchin) | — | H3JG74 | —      |
| <i>Schistosoma japonicum</i> (Blood fluke)               | — | C1LHT1 | —      |
| <i>Loa loa</i> (Eye worm)                                |   | E1FKS7 |        |
| <i>Caenorhabditis briggsae</i>                           | — | —      | A8XU29 |
| <i>Caenorhabditis brenneri</i> (Nematode worm)           | — | —      | G0P9M6 |
| <i>Caenorhabditis elegans</i>                            | — | —      | G5EFJ2 |
| <i>Caenorhabditis remanei</i>                            | — | —      | E3NKN8 |
