# Supplementary material for: DBC1/CCAR2 and CCAR1 Are Largely Disordered Proteins that Have Evolved from One Common Ancestor
Source: Biomed Res Int. 2014 Dec 11;2014:418458. doi: 10.1155/2014/418458 (PMC4287135; doi:10.1155/2014/418458)
Supplement: Supplementary file 3 [file 418458.f3.pdf]

|          |     |                                                                |
|----------|-----|----------------------------------------------------------------|
| hDBC1-C  | 481 | NAETPEATTQQETDSDLPEAPPPLEPAVIARPGCVNLSLHGIVEDRRPKER-ISFEVMV    |
| hCCAR1-C | 721 | -----YILPDEPAIIVHPNWAAKSGKFDCSIMSLSVLLDYRLEDNKEHSFEVSL         |
|          |     | . * * * . * . : . * : ** : : * . : : * * * * :                 |
| hDBC1-C  |     | LAELFLEMLQRDFGYRVYKMLLSLPEKVVSPPEPEKEEEAAKEEATKEEEAIKEEVVKEPK  |
| hCCAR1-C |     | FAELFNEMLQRDFGVRIYKSLLSLPEKED---KKEKDKKSKKDERKDKKEERDDETDEPK   |
|          |     | : * * * * * * * * * * * : * * : : * * : : * * : : : . * * *    |
| hDBC1-C  |     | DEAQNEGPATESEAPLKEDGLLPKPLSSGGEEEEKPRGEASEDLCEMALDPELLLLRDDG   |
| hCCAR1-C |     | PKRRKSGDDKDKKEDRDERKKEDKRDSDSKDDDETEEDNNQDEYDPMEEAEDEEDDRD     |
|          |     | : : . * . : : . * * . . . : : * . . : : * : * .                |
| hDBC1-C  |     | EEEFAGAKLEDSEVRSVASNQSEMEFSSLQDMPKELDPSAVLPLDCLLAFVFFDANWCGY   |
| hCCAR1-C |     | EEEMTKRDDKRDINRYCKERPS-----KDKEKEKTQMITINRDLLMAFVYFDQSHCGY     |
|          |     | * * * : : . : . * . . * : * * * . : * * * * * : * * *          |
| hDBC1-C  |     | LHRDLERILLTLGIRLSAEQAKQLVSRVVTQNICQYRSLQYSRQEGLDGGLP---EEVL    |
| hCCAR1-C |     | LLEKDLLEEILYTLGLHLSRAQVKLLNKVVLRESCFYRKLTDTSKDEENHEESESLEQEDM  |
|          |     | * . : * * * . * * * * : : * * * . * : : * : . : * :            |
| hDBC1-C  |     | FGNLDLLPPPGKSTKPGAAPTEHKALVSHNGSLINVGSLQRAEQQDSGRLYLENKIHTL    |
| hCCAR1-C |     | LGNRLLLPTP-TVKQESKDVEENVGLIVYNGAMVDVGSLQKLEKSEKVRAEVEQKLQLL    |
|          |     | : * * * * * . * . : . * : . * : * * : : : * * * * : * : : * :  |
| hDBC1-C  |     | ELKLEESHNRFSATEVTNKTAAEMQELRVRLAEAEETARTAERQKSQQLRLLQELRRRL    |
| hCCAR1-C |     | EEKTDEDEKTI LNLENSNKSLSGELREVKKDLSQLQENLKISENMNLQFENQMKNKTIRNL |
|          |     | * * : * . : : * : * * : : . * : : : * : : * : : * : : * . *    |
| hDBC1-C  |     | TPLQLEIQRVVEKADSWVEKEEPPASN-----923                            |
| hCCAR1-C |     | STVMDEIHTVLKKDNVKNEDKDQKSKENGASV1150                           |
|          |     | : . : * * : * : * : * . : : . . :                              |
