# Supplementary material for: DBC1/CCAR2 and CCAR1 Are Largely Disordered Proteins that Have Evolved from One Common Ancestor
Source: Biomed Res Int. 2014 Dec 11;2014:418458. doi: 10.1155/2014/418458 (PMC4287135; doi:10.1155/2014/418458)
Supplement: Supplementary file 4 [file 418458.f4.pdf]

|        |                                                                |      |
|--------|----------------------------------------------------------------|------|
| F1QV66 | MAQFGGQKNPPWAAQFAATAVSQPGHTGQSLDLNSLHSLGVQQQSLLGASPMYTQQSALA   | 60   |
| G5EFJ2 | MSQFGGKPP-----GQWHRPAAPGGAPQLSGFSAVNFGGVPVGMG---VPMGMVN        | 49   |
| F1QV66 | ASLNSQSAANYQLSQQTAAALQQQAAAAAAAAAALQQSQINSALQQYQQQQQQQQPPQAP   | 120  |
| G5EFJ2 | QAAFSSQGVLMQG-----IMGAVPQQSLPQQQPNFQQQNSLQQG-----              | 89   |
| F1QV66 | PPQPPQQTLYNVPHQLPQPQQALLSQPPVALPTSLSLSNPQQTQAQITVSYPTPRSSHQ    | 180  |
| G5EFJ2 | -----TNMQQ                                                     | 94   |
| F1QV66 | QTQPQKQRVFTGVVSKLHDTFGFVDEDVFFQLSAVKGKTPQVGDRVLVEAVYNPNMPFKW   | 240  |
| G5EFJ2 | NSGAKNQRTFVGVTKMLDTYGFVDDVFFQHSVIRGSHPRVGDVMEANYNPSMPFKW       | 154  |
| F1QV66 | NAQRIQTLPLQPNQTHQPPQPLPQVSPQLSSFYTDAGMQRYSDLHSAVDSRQNSQPQVFN   | 300  |
| G5EFJ2 | NAYRIQLLNAATQQ-----EPARQAPQQQMHQPQRGGQESQRWGAAPASGTSDRADRNG    | 209  |
| F1QV66 | MMKPGPTMLQSLPPPTTFSVPAQGPPPSLLQAQLSAASLAPLLQNPPQPLLPQPPPKDSV   | 360  |
| G5EFJ2 | GARGNDSPLHRSSAARRHSPPRRASP-----PRRTSSPKRDAR                    | 248  |
| F1QV66 | FSGGLLPFVRMMPQPQVRRVEPSRPFNRSRPELILRKDDRSRERERERRRSRERSP       | 420  |
| G5EFJ2 | PAR-----EIRDSREPREVRRSPP-----PRRAASP-----RKASSPAPAKNDRKERSP    | 294  |
| F1QV66 | MRKRSRDRSPRRERSPRRPRRVPRYTVQFSKFSLDGYNCDMMELRRRYQSLYIPSDFFN    | 480  |
| G5EFJ2 | SGSVAPSVRRRESASPPRRRARIIPRYECRAQKFPALLSPIVSGSVLRHRYSKLYLPDSDYD | 354  |
| F1QV66 | AVFTWVDAFPLSRPFTFGNYCNFHHMHKEVDSLKN-TAVLDPPDANHTYSAKVMLLANP    | 539  |
| G5EFJ2 | LSFDWVRSFQLDLSLDLSNPIQFHVFNKDVDFIGEEIQLDLPEDADHRHQVKVLLLSHA    | 414  |
| F1QV66 | SLDELYHKSCALSED-PAELRDSFQHPARLIKFLVGMRGKDEAMAIGGHWSPSLDGADPE   | 598  |
| G5EFJ2 | GKSEVVKKAFCMLADGTTDDHQEPQSLLKNLHFLVGARGK-ETMGIGGSWSPSQDGADPN   | 473  |
| F1QV66 | HDASVLIKTAVRCCALTGIDLSLCTQWYRFAEIRYHRPEETHKGRTPAHVETVVLFLP     | 658  |
| G5EFJ2 | S-ATTMIRTAVRTTKSLTGIDLSSVSQWFSMVQIRYRQADKQRIDHVNLYLLPDTQSLALD  | 532  |
| F1QV66 | DVWHCLPTRSEWEELSRGLK-----EQLAEKLL                              | 686  |
| G5EFJ2 | DAQWMLAETKIAEQLKAKLANVDALKIEEDEPPVMMVEESESVVAADVVPEQSI         | 592  |
| F1QV66 | AERKEADGEQEEEDKDEDDSKVETT-----PTHWSKLD                         | 719  |
| G5EFJ2 | PDVKKEELQAEPPKVLNDNVKAESDVVADVSMNSTTDADNSEAPAAENGQGPTNWSNLD    | 652  |
| F1QV66 | PKSMKVDLRKELESRLSSKGLKSQLIARLTQQLKVEEQVEESKEPEKPEPPSVEE--      | 776  |
| G5EFJ2 | PKSMKVAELRVELELRGLETKGIKTLVQRLQTLALDTEKAAEASVAARDVEMRDAENAV    | 712  |
| F1QV66 | -----DESCRLEDDREEERKRQEEQERQRRERR-----Y                        | 806  |
| G5EFJ2 | KQEGGEENPAAFIAPSIETKAKTEABAKEAEAEKRRKKKEQLEKEKKEKREALEKHY      | 772  |
| F1QV66 | VLPDEPTIIVHPNWAANKGKFCDSIMSLSVLLDYRLDNKEHSFEVSLFAELFNEMLQRD    | 866  |
| G5EFJ2 | QLPKDKKILVFPSPKSKFGKFDCKVLSLSLLDYRHDDNKENQFEVSLFAEAFKEMIERN    | 832  |
| F1QV66 | FGYRIYKALASLPTKDEKKDKKERAKKEAERRDIKKERDEDNGEPVAKRIREEDDKRKDE   | 926  |
| G5EFJ2 | AAFTIYETLANCGDRDAEK-----KRRDE                                  | 856  |
| F1QV66 | EKERIKREESKDDDDNEDGSSNNNADEYDPLEAEDADDYDDDDKDDDEDSNGRDRDRDR    | 986  |
| G5EFJ2 | AREKPVPEKPEKE-----PAETTEKAAEGEEKKDEKEEKREKKDEKR                | 899  |
| F1QV66 | DDRKSKDRSSKDDEKKRQMVTFNKLDMAFVYFDQSHCGYLLEKDLLEEIMYTLGLHLRS    | 1046 |
| G5EFJ2 | EKKREK-----VERIDLKSVVANRTVYEAFLSFDNLGCGYLTEDIEIYNGEFGISR       | 953  |
| F1QV66 | AQVKKLLNKPLVKESCHYRKLTPRKDEPCPALISEAHIDNLLGNQILLT-----         | 1096 |
| G5EFJ2 | GQIQKLAKKLSVRDKINRYRLTDVLTMDGNVRHTPGGADVVETDDLIRGFGYNLAKSM     | 1013 |
| F1QV66 | ----SQIKREPDESGESGLIVYKALVDVGSMQKLEKSEKTREDIEQKLMQQDVKME       | 1152 |
| G5EFJ2 | EPADSGAAVKSSEVSASSDGVVIINGSAVNVVQKMKLLKQVEKERDEAKSTVSEQLSLIE   | 1073 |
| F1QV66 | EDSKHLSELEAANRSLQKELDDVKNTLRETESKLTASDQRKGRFEQQLHSTVSSLDTIK    | 1212 |
| G5EFJ2 | QLREAKAEIDKKKKDIDSHYKSNKKLNETSQQLKSTQDENSALKQALQDCKRHADRIFS    | 1133 |
| F1QV66 | ELQGVLANNDHSEDADHKTQANGSDE-----                                | 1238 |
| G5EFJ2 | VVEKVMPPPPKKEEKKDEKKTDKKDDKVSEKSAEKSTEEPSQEVFASAEQAAEPSTE      | 1193 |
| F1QV66 | -----                                                          |      |
| G5EFJ2 | AEPIVIDESEDKDAEVVEESKE                                         | 1215 |
